# Supplementary material
Source: Research Square preprint supplement (doi:10.21203/rs.3.rs-10161531/v1)
Supplement: Supplementary file 1 [file 3335c072ab12707604963586.docx]

| **Table A1**: Impact of Chinese FDI on South Asians’ per capita income: Robustness checks with the Arellano Bond GMM and Panel Quantile regression estimation | | | | | | |
| --- | --- | --- | --- | --- | --- | --- |
| Depend variable: GDP per capita (ln) | Arellano Bond Estimate | | | Quantile Regression Estimate | | |
| (1) | (2) | (3) | (4)Δ | (5)Δ | (6)Δ |
| GDP per capita (ln), first lag | 0.828*** | 0.714*** | 0.613*** |  |  |  |
|  | (0.119) | (0.196) | (0.198) |  |  |  |
| GDP per capita (ln), second lag |  | 0.0854 | -0.179 |  |  |  |
|  |  | (0.196) | (0.223) |  |  |  |
| GDP per capita (ln), third lag |  |  | 0.394** |  |  |  |
|  |  |  | (0.173) |  |  |  |
| Chinese FDI (ln) | 0.0694** | 0.0699** | 0.0517 | 0.132*** | 0.149*** | 0.158*** |
|  | (0.0275) | (0.0317) | (0.0433) | (0.0124) | (0.0165) | (0.0110) |
| Total FDI (ln) | -0.00549 | -0.00636 | -0.00942 | 0.200*** | 0.215*** | 0.148*** |
|  | (0.0192) | (0.0197) | (0.0195) | (0.0188) | (0.0382) | (0.0255) |
| Military expenditure (ln) | 0.0383 | 0.0195 | -0.00377 | 0.173*** | 0.285*** | 0.0360 |
|  | (0.0997) | (0.103) | (0.105) | (0.0539) | (0.0781) | (0.0794) |
| Total population (ln) | -0.817** | -0.775** | -0.799* | -0.314*** | -0.410*** | -0.339*** |
|  | (0.368) | (0.380) | (0.423) | (0.0449) | (0.0479) | (0.0245) |
| Corruption control (ln) | 0.00547 | -0.00963 | -0.0317 | 0.0528** | 0.0805*** | 0.162*** |
|  | (0.0385) | (0.0410) | (0.0471) | (0.0245) | (0.0263) | (0.0348) |
| Political stability (ln) | -0.0329 | -0.0275 | -0.0411 | 0.182*** | 0.207*** | 0.199*** |
|  | (0.0273) | (0.0317) | (0.0353) | (0.0199) | (0.0346) | (0.0377) |
| Constant | 15.98** | 15.46** | 15.98** | 9.940*** | 11.50*** | 10.71*** |
|  | (6.422) | (6.580) | (7.166) | (0.730) | (0.717) | (0.410) |
| Observations | 103 | 98 | 93 | 116 | 116 | 116 |
| Number of ID | 6 | 6 | 6 |  |  |  |
| **Note:** Standard errors in parentheses. Models 1-3, present results from the Arellano Bond’s (1991) GMM estimator. Models 4-6, present results from the Koenker & Bassetts’ (1978) Panel Quantile Regression estimator. Δ Model (4) stands for quantile 25th, Model (5) represents quantile 50th, and Model (6) denotes quantile 75th. All variables including dependent and independents are incorporated with their natural logarithm forms. Source: Authors calculation. *** p<0.01, ** p<0.05, * p<0.1. | | | | | | |

| **Table A2**: Impact of Chinese FDI on South Asians’ per capita income: Robustness checks with the PCSE estimation | | | | | | | | | |
| --- | --- | --- | --- | --- | --- | --- | --- | --- | --- |
|  | Panel-level heteroskedasticity and correlated across panels | | | Panel level heteroskedasticity | | | Independent errors across panels | | |
|  | (1) | (2) | (3) | (4) | (5) | (6) | (7) | (8) | (9) |
|  | No auto | AR (1) | PSAR (1) | No auto | AR (1) | PSAR (1) | No auto | AR (1) | PSAR (1) |
| Chinese FDI (ln) | 0.141*** | 0.147*** | 0.126*** | 0.141*** | 0.147*** | 0.126*** | 0.141*** | 0.147*** | 0.126*** |
|  | (13.12) | (9.035) | (9.759) | (10.55) | (8.035) | (9.096) | (10.27) | (8.065) | (9.552) |
| Total FDI (ln) | 0.185*** | 0.101*** | 0.052*** | 0.185*** | 0.101*** | 0.052*** | 0.185*** | 0.101*** | 0.052*** |
|  | (5.981) | (3.788) | (3.033) | (7.837) | (4.241) | (2.826) | (8.796) | (4.804) | (3.027) |
| Military exp (ln) | 0.196*** | 0.111 | 0.0843 | 0.196*** | 0.111 | 0.0843 | 0.196*** | 0.111 | 0.0843 |
|  | (2.996) | (1.255) | (0.991) | (2.639) | (1.088) | (0.982) | (2.763) | (1.167) | (1.122) |
| Total population (ln) | -0.342*** | -0.202*** | 0.00422 | -0.342*** | -0.202*** | 0.00422 | -0.342*** | -0.202*** | 0.00422 |
|  | (-9.931) | (-5.280) | (0.0991) | (-12.05) | (-4.850) | (0.101) | (-11.57) | (-4.869) | (0.102) |
| Corruption control (ln) | 0.0850** | 0.0713 | 0.0319 | 0.0850** | 0.0713 | 0.0319 | 0.0850** | 0.0713* | 0.0319 |
|  | (2.379) | (1.615) | (1.067) | (2.242) | (1.618) | (1.158) | (2.419) | (1.957) | (1.327) |
| Political stability (ln) | 0.201*** | 0.174*** | 0.146*** | 0.201*** | 0.174*** | 0.146*** | 0.201*** | 0.174*** | 0.146*** |
|  | (7.384) | (4.939) | (5.890) | (6.527) | (5.081) | (6.077) | (6.622) | (5.537) | (6.455) |
| Constant | 10.56*** | 8.649*** | 5.234*** | 10.56*** | 8.649*** | 5.234*** | 10.56*** | 8.649*** | 5.234*** |
|  | (20.24) | (13.77) | (7.802) | (23.67) | (12.46) | (7.849) | (22.12) | (12.56) | (7.918) |
| Observations | 116 | 116 | 116 | 116 | 116 | 116 | 116 | 116 | 116 |
| R-squared | 0.878 | 0.926 | 0.995 | 0.878 | 0.926 | 0.995 | 0.878 | 0.926 | 0.995 |
| chi2 | 1066 | 237.0 | 396.3 | 715.5 | 195.5 | 448.5 | 781.3 | 251.2 | 494.6 |
| **Note:** Standard errors in parentheses. All variables including dependent and independents are incorporated with their natural logarithm forms. Source: Authors calculation. *** p<0.01, ** p<0.05, * p<0.1. | | | | | | | | | |
